# Supplementary material
Source: HighWire-hosted journal article supplement (https://www.jneurosci.org/highwire/filestream/600051/field_highwire_adjunct_files/4/Figure_S5.pdf)

Figure S5

L4-6 components of axons in deprived animals

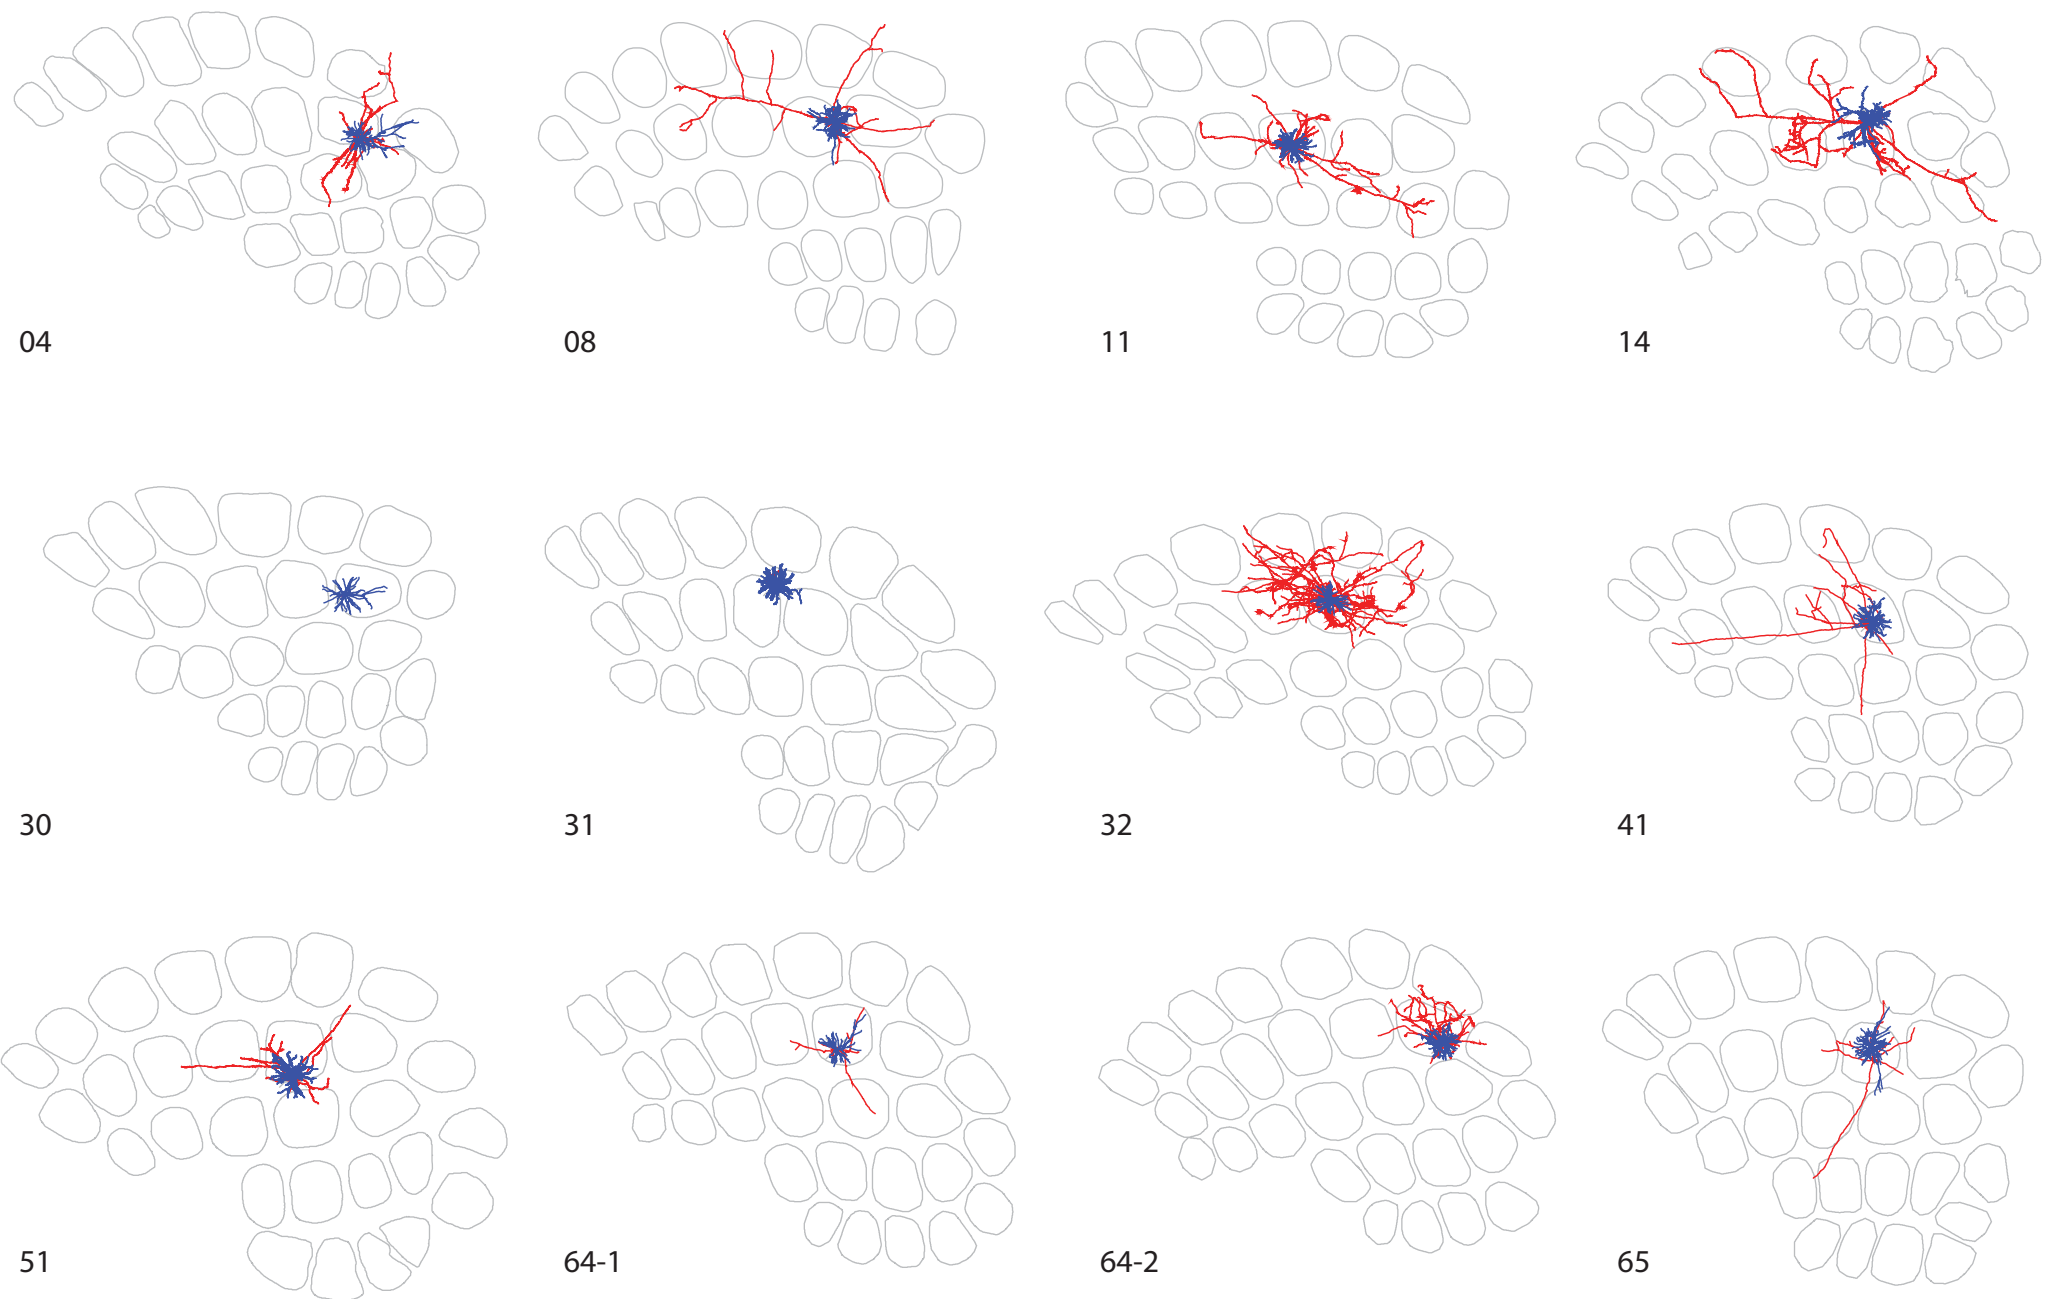

500  $\mu$ m

Supplement: Figure_S5.pdf [file Figure_S5.pdf]
